# Supplementary material for: Chemerin facilitates intervertebral disc degeneration via TLR4 and CMKLR1 and activation of NF-kB signaling pathway
Source: publisher site journal article supplement (doi:10.18632/aging.103339), 2020-06-11
Supplement: Supplementary file [file aging-v12i12-103339-supplementary-material-SD1.pdf]

SUPPLEMENTARY FIGURES

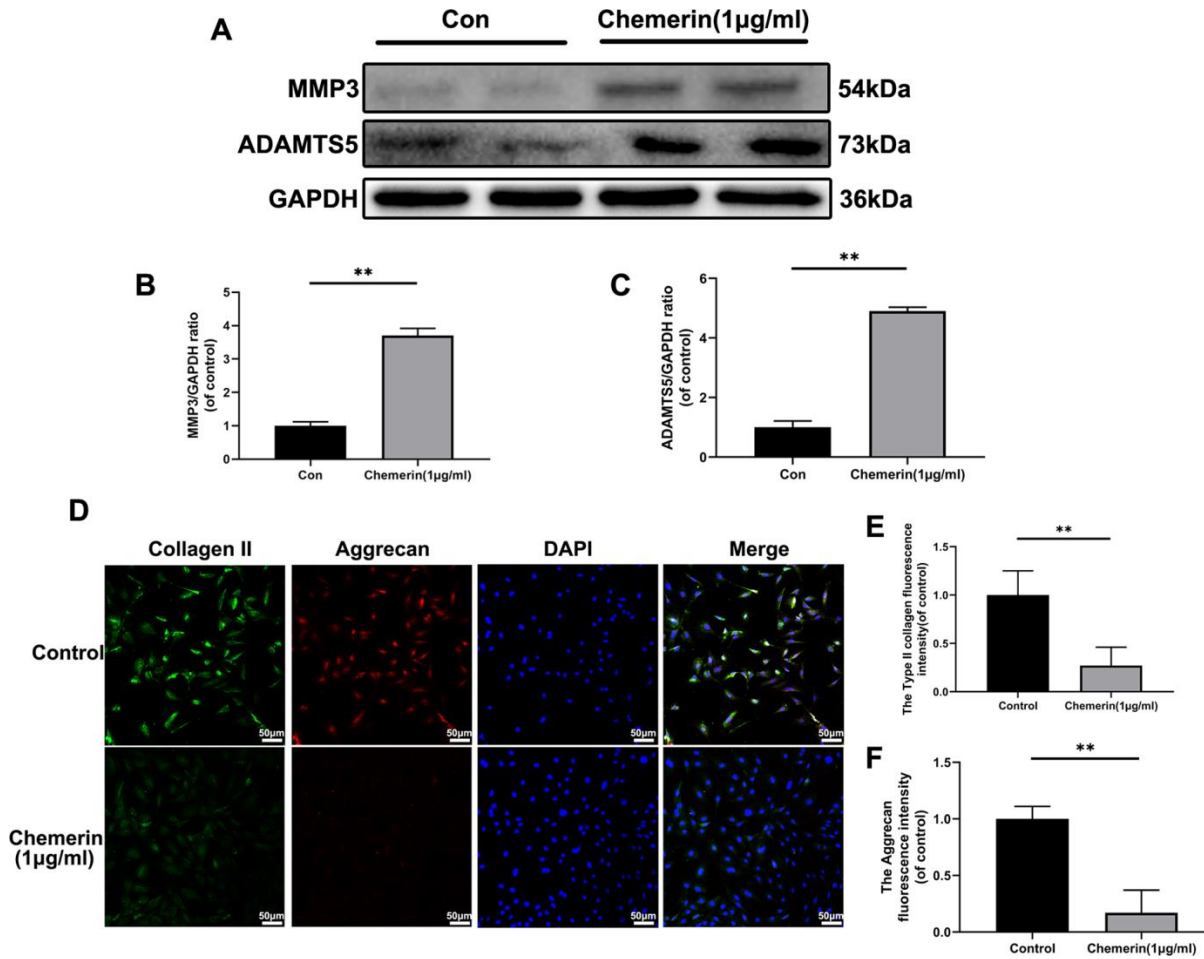

**Supplementary Figure 1. Effect of chemerin on anabolism, and catabolism of ECM in human AFCs.** (A) The expression levels of MMP3 and ADAMTS5 were visualized by western blotting. (B, C) Quantification of MMP3 and ADAMTS5 immunoblots. (D) The expression levels of collagen II and aggrecan were observed by immunofluorescence, and (E, F) the fluorescence intensity analyzed using Image J. Data are represented as mean ± SEM of three independent experiments, each done in triplicate. Significant differences between groups are indicated as \*\*p < 0.01, \*p < 0.05.

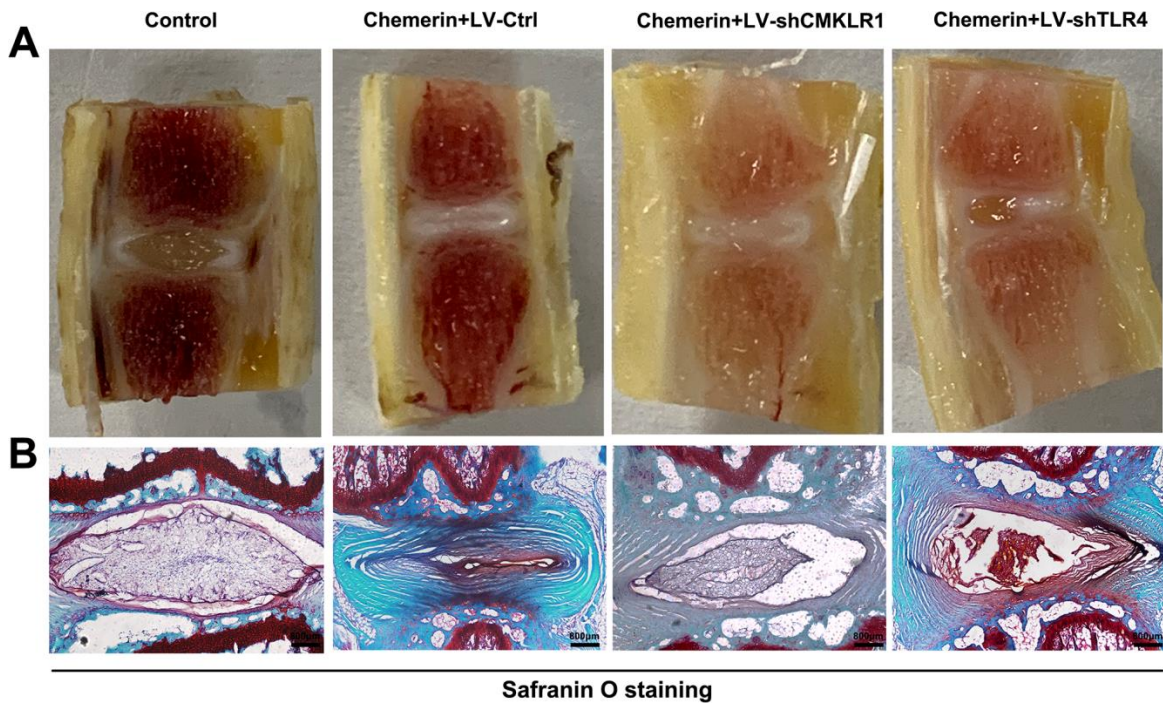

**Supplementary Figure 2. Effects of Chemerin aggravates IVDD through TLR4 and CMKLR1 in an ex vivo model. (A)** Digital photograph of Representative SO staining of punctured disc in different group. **(B)** Representative SO staining of punctured disc in different group.
